# Supplementary material for: Vimentin Localization in the Zebrafish Oral Cavity: A Potential Role in Taste Buds Regeneration
Source: MDPI journal article supplement (doi:10.3390/ijms242115619), 2023-10-26
Supplement: s1 [file s1]

## RESULTS

### *Control experiment of immunoreaction*

During the immunofluorescences and immunoperoxidase experiments, the serial representative sections used as a negative control without primary antibodies (Vimentin RV202, Calretinin N-18, and Ubiquitin) showed no immunoreactivity (Figure 11).

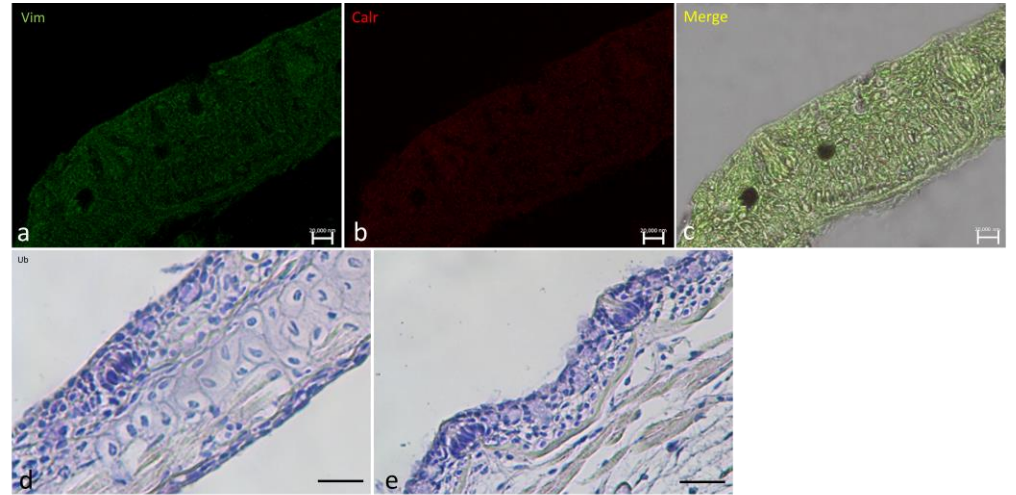

Control experiment performed without primary antibodies showing no immunoreactivity to Vimentin RV202, Calretinin N-18 (**a, b, c**) and Ubiquitin (**d, e**). (**a, b, c**) Magnification 20 $\times$ ; Scale Bar 20 $\mu$ m. (**d, e**) Magnification 20 $\times$ ; Scale Bar 100 $\mu$ m
